# Supplementary material for: A seismic analysis of subglacial lake D2 (Subglacial Lake Cheongsuk) beneath David Glacier, Antarctica
Source: Copernicus journal article supplement (doi:10.5194/tc-20-647-2026), 2026-01-26
Supplement: Supplementary file 1 [file tc-20-647-2026-supplement.pdf]

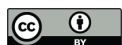

## *Supplement of*

# **A seismic analysis of subglacial lake D2 (Subglacial Lake Cheongsuk) beneath David Glacier, Antarctica**

**Hyeontae Ju et al.**

*Correspondence to:* Seung-Goo Kang ([ksg9322@kopri.re.kr](mailto:ksg9322@kopri.re.kr))

The copyright of individual parts of the supplement might differ from the article licence.

9 S1. Seismic data acquisition

10

11 **Table S1: Seismic survey work schedules**

| Date (dd/mm/yy)     | Job                                                                                 | Work day (day) |
|---------------------|-------------------------------------------------------------------------------------|----------------|
| 01/12/21            | GPR survey                                                                          | 1              |
| 04/12/21 – 05/12/21 | Marked shot position                                                                | 2              |
| 06/12/21 – 28/12/21 | Hot water drilling (25 m) and explosive installation<br>(4 lines, total 144 points) | 14             |
| 12/12/21 – 02/01/22 | Seismic survey (4 lines)                                                            | 11             |

12

13

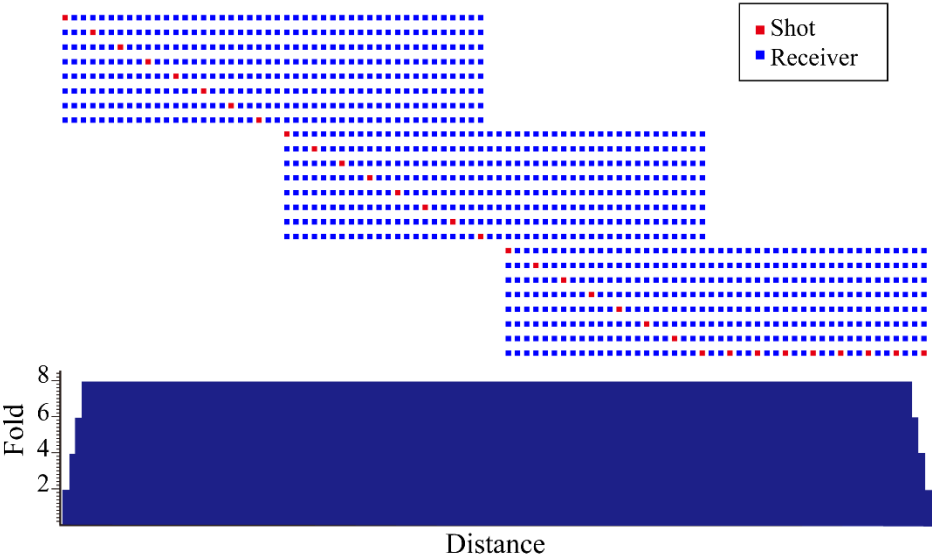

14

15 **Figure S1: In the seismic survey layout, only the odd-numbered receivers are displayed, that is, one receiver marked every two**  
16 **channels.**

17

18 S2. Seismic data processed parameters and results  
19 This study utilized the Omega geophysical data processing platform (SLB) for seismic data processing. Among the various  
20 processing steps, we provide below the key parameters applied during procedures that directly influence the ice–bedrock  
21 interface signal, such as noise attenuation.  
22

23 1. Anomalous amplitude attenuation (AAA) for the 1<sup>st</sup> round

24 AAA is a frequency-domain filtering technique designed to suppress spatially coherent anomalous amplitudes such as swell  
25 noise and rig noise, by comparing amplitude spectra across traces and attenuating outliers based on spatial median statistics.  
26 The method identifies frequency bands with anomalous energy by comparing each trace’s amplitude spectrum within a spatial  
27 window to the median of its neighboring traces. Detected anomalies are either scaled or replaced using interpolated values  
28 from adjacent traces, preserving relative amplitude relationships. Key parameters include TIME, which defines the temporal  
29 window of threshold application; THRESHOLD FACTOR, which sets the amplitude level considered anomalous; and  
30 SPATIAL MEDIAN WIDTH, which specifies the number of adjacent traces used for median computation. Proper tuning of  
31 these parameters is essential to avoid signal distortion while effectively attenuating coherent noise. AAA is particularly useful  
32 in prestack data conditioning as it enhances seismic data quality without compromising true subsurface reflections (SLB,  
33 2025a).

- 34 ● SPATIAL MEDIAN WIDTH: 21 traces
- 35 ● Threshold factor tables:

| TIME | THRESHOLD FACTOR |
|------|------------------|
| 0    | 15               |
| 1000 | 10               |
| 3000 | 7                |
| 4000 | 6                |

36

37 2. Curvelet transform-based filter for 1<sup>st</sup> round

38 Curvelet Transform is a multi-scale, multi-directional decomposition technique that provides a sparse representation of seismic  
39 data by capturing curved wavefronts more efficiently than conventional fourier or wavelet transforms. An important aspect of  
40 the Curvelet Transform implementation involves user-defined control over the scale and angle bounds that determine which  
41 components of the data will be transformed. The LOWER BOUND OF SCALE and HIGHER BOUND OF SCALE specify  
42 the range of spatial frequencies (scales) to be included in the transform. Lower scales correspond to coarse, low-frequency  
43 components, while higher scales capture fine, high-frequency structural details. The LOWER BOUND OF ANGLE and

HIGHER BOUND OF ANGLE define the directional sectors (angles) within each scale to be analyzed. This allows selective enhancement or suppression of events based on their dip or propagation direction (SLB, 2025b). Figure S2 illustrates how the f-k domain is partitioned into curvelet panels by scale and angle. Adjusting these bounds allows for targeted signal processing, such as isolating curved events or attenuating directionally coherent noise. These parameters provide valuable flexibility in customizing the transform for specific seismic applications.

● Panel manager

| LOWER BOUND<br>OF THE SCALE | HIGHER BOUND<br>OF THE SCALE | LOWER BOUND<br>OF THE ANGLE | HIGHER BOUND<br>OF THE ANGLE |
|-----------------------------|------------------------------|-----------------------------|------------------------------|
| 2                           | 2                            | 1                           | 3                            |
| 2                           | 2                            | 8                           | 10                           |
| 3                           | 3                            | 1                           | 6                            |
| 3                           | 3                            | 13                          | 18                           |
| 4                           | 4                            | 1                           | 6                            |
| 4                           | 4                            | 13                          | 18                           |

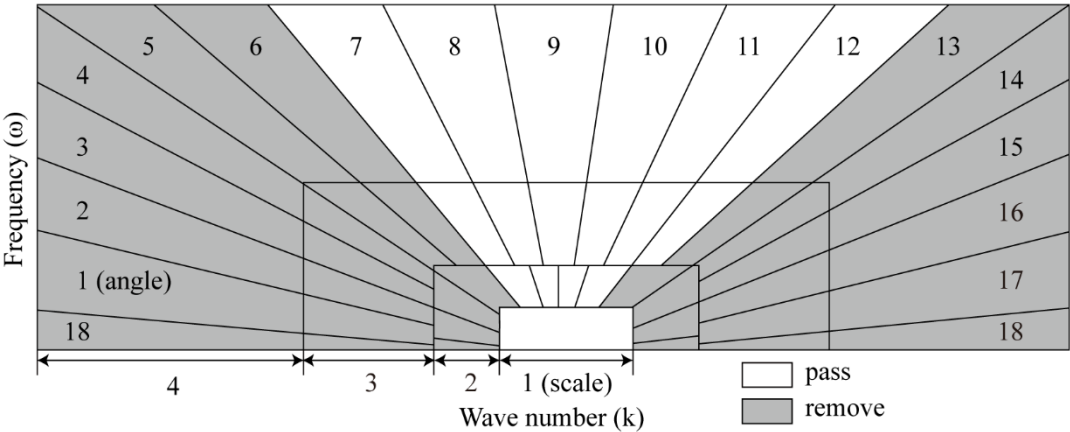

**Figure S2: Illustration of the panel manager. In the f-k domain, the hatched area is identified as noise and removed accordingly.**

### 3. Surface-consistent deconvolution

Surface-Consistent Deconvolution is a technique for generating and applying deconvolution operators that are consistent across seismic sources, receivers, offset ranges, and CMP locations (SLB, 2025c; Yilmaz, 2001).

Key processing parameters used in this workflow include:

- `CONSTANT_ACOR_LENGTH = 100`: Defines the half-length of the autocorrelation window used in operator design, balancing spectral resolution and filter stability.

- WHITE NOISE PERCENT = 0.01: Adds 1% white noise to stabilize the autocorrelation estimation and prevent over-whitening of the signal.
- PREDICTION DISTANCE = 2.5: Specifies the prediction lag in the predictive filter design; this parameter controls the temporal range of the filter’s effect, influencing multiple suppression and resolution.

4. Anomalous amplitude attenuation (AAA) for the 2<sup>nd</sup> round

- Spatial median width: 11 traces
- Threshold factor tables:

| Time | Threshold factor |
|------|------------------|
| 0    | 8                |
| 1000 | 6                |
| 3000 | 4                |
| 4000 | 3                |

5. Curvelet transform-based filter for the 1<sup>st</sup> round: same as 1<sup>st</sup> round parameter

6. Frequency-offset coherent noise suppression (Figure S4.c)

The frequency–offset (F-X) Coherent Noise Suppression (FXCNS) module is designed to attenuate near-surface shot-generated coherent noise, such as dispersive surface waves and trapped modes, which interfere with primary seismic reflections, particularly in 3D shot or receiver gathers with irregular spatial sampling (Hildebrand, 1982). FXCNS operates in the frequency domain by modeling coherent noise using fan filters and estimating it in a least-squares sense for each trace based on local neighbors within a specified azimuthal sector. The estimated coherent noise is then subtracted from the original signal, preserving true reflection events (SLB, 2025d).

- LOW PASS VELOCITY: 100
- LOW STOP VELOCITY: 300
- HIGH PASS VELOCITY: 8000
- HIGH STOP VELOCITY: 10000

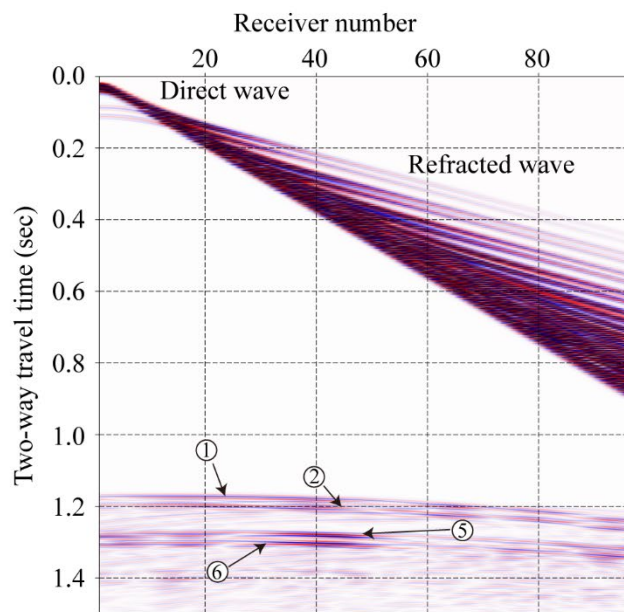

(a) Raw data shot gather of synthetic

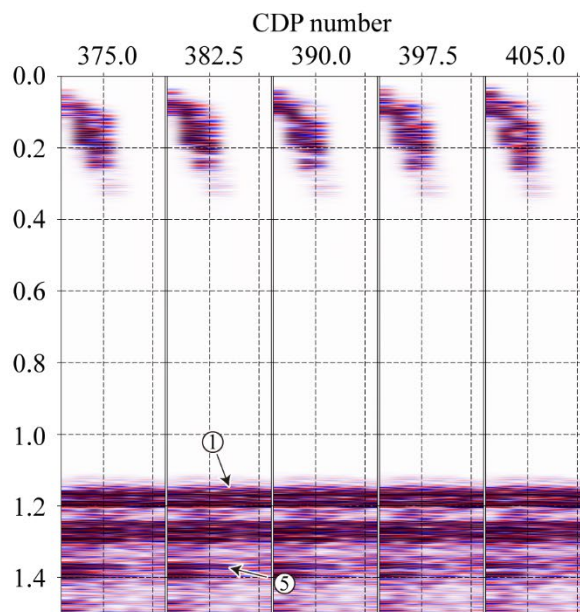

(b) After pre-stack time migration

83  
 84 **Figure S3: Results before and after data processing. (a) Synthetic data of shot gather #1. (b) Result after pre-stack time migration.**  
 85 **Symbols (see Table 2).**

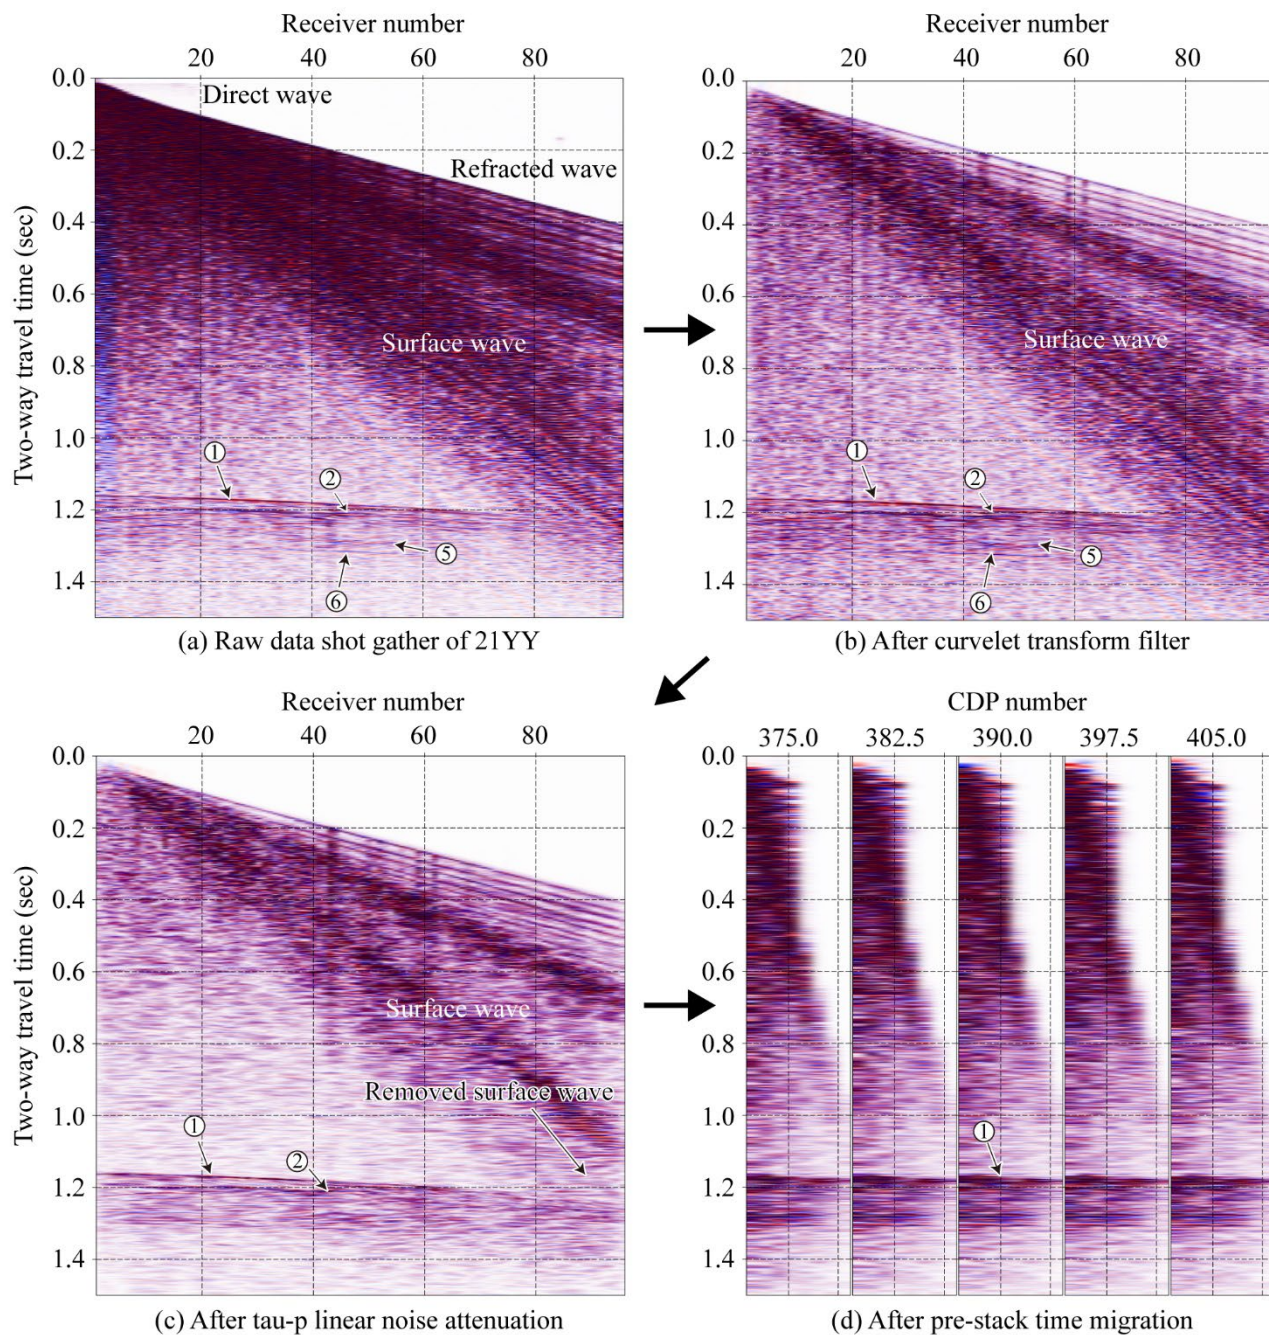

**Figure S4: Results at each stage of data processing. (a) Shot gather #1 from 21YY. (b) Removal of high-frequency random noise and coherent linear noise. (c) Application of a frequency-offset coherent noise filter and tau-p linear noise attenuation for surface wave removal. (d) Result after applying pre-stack time migration.**

93 1. IPR data uncertainty in glacier thickness estimates

94 The vertical uncertainty of the GNSS data was estimated to be 0.98 m. At the 99% confidence level, the uncertainties in surface  
 95 and bed elevation measurements were calculated as  $\pm 6.9$  m and  $\pm 32.7$  m, respectively (Figure S5). When incorporating the  
 96 GNSS vertical uncertainty, the total uncertainties in surface and bed elevations increased slightly to  $\pm 7.0$  m and  $\pm 32.7$  m,  
 97 respectively. Consequently, the overall uncertainty of the IPR-derived ice thickness was estimated to be  $\pm 33.4$  m.

98 
$$U_{IPR} = \sqrt{(\pm 7.0 \text{ m})^2 + (\pm 32.7 \text{ m})^2} = \pm 33.4 \text{ m.}$$
 S3.1

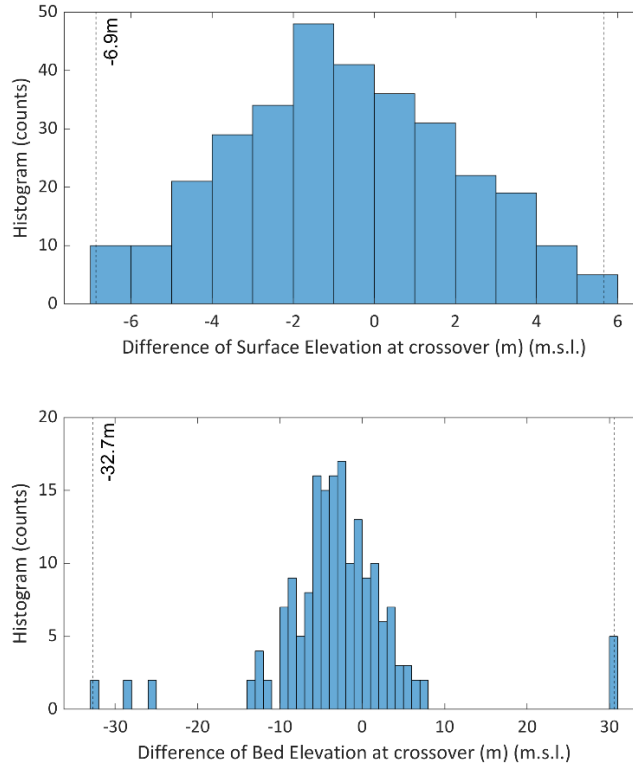

100

101 **Figure S5. Measurement uncertainty results of surface and ice bottom elevations from IPR data.**

102

103 2. Seismic data uncertainty in glacier thickness estimates

104 The uncertainty associated with seismic picking arises from the presence of noise and is quantified as picking uncertainty  
 105 ( $U_{pick}$ ), which can be estimated using the following equation (Abakunov et al., 2020):

106 
$$\sigma_{pick} = 2 \sqrt{\frac{T^2}{4\pi^2} \frac{1}{SNR}},$$
 S3.2



107 where  $T$  is the period of the central frequency and SNR is the signal-to-noise ratio. Based on this formulation, the SNRs of the  
108 first arrival and the ice–water interface signals were determined to be 88.8 dB and 10 dB, yielding vertical uncertainties of 0.2  
109 m and 2.1 m, respectively.

110 
$$U_{pick} = 2.58 \sigma_{pick} = \pm 5.4 \text{ m.} \quad \text{S3.3}$$

111 The total picking uncertainty at the 99% confidence level is 5.4 m. Under glacial temperature conditions of  $-2 \pm 2 \text{ }^\circ\text{C}$ , where  
112 the average P-wave velocity in ice is  $3800 \pm 5 \text{ m s}^{-1}$  (Kohnen, 1974), the uncertainty associated with the variability in seismic  
113 velocity is estimated to be  $\pm 5.3 \text{ m}$ . Assuming a firn layer thickness of 100 m, the combined measurement uncertainty of the  
114 seismic results at the 99% confidence level is calculated to be 7.6 m.

115 
$$U_{seis} = \sqrt{(\pm 5.4 \text{ m})^2 + (\pm 5.3 \text{ m})^2} = \pm 7.6 \text{ m.} \quad \text{S3.4}$$

116

117

118 **References**

119 Abakumov, I., Roeser A., and Shapiro S. A.: Arrival-time picking uncertainty: Theoretical estimations and their  
120 application to microseismic data, *Geophysics*, 85, U65–U76, <https://doi.org/10.1190/geo2019-0589.1>, 2020.

121 Hildebrand, S. T.: Two representations of the fan filter, *Geophysics*, 47, 957–959,  
122 <https://doi.org/10.1190/1.1441363>, 1982.

123 Kohnen, H.: The temperature dependence of seismic waves in ice, *J. Glaciol.*, 13, 144–147,  
124 <https://doi.org/10.3189/s0022143000023467>, 1974.

125 SLB: Omega Geophysical Processing System – Anomalous Amplitude Noise Attenuation  
126 (ANOMALOUS\_AMP\_ATTEN) Module Documentation, Version 27.14, SLB manual, Houston, TX,  
127 2025a.

128 SLB: Omega Geophysical Processing System – Curvelet Transform (CURVELET\_TRANSFORM) Module  
129 Documentation, Version 22.1, SLB manual, Houston, TX, 2025b.

130 SLB: Omega Geophysical Processing System – Surface-Consistent Deconvolution Analysis  
131 (SC\_DCN\_SPCTRL\_ANL) Module Documentation, Version 13.18, SLB manual, Houston, TX, 2025c.

132 SLB: Omega Geophysical Processing System – F-X Coherent Noise Suppression (FXCNS) Module  
133 Documentation, Version 3.16, SLB manual, Houston, TX, 2025d.

134 Yilmaz, Ö.: Seismic data analysis: Processing, Inversion, and Interpretation of Seismic Data, Appendix B.8  
135 (Surface-Consistent Deconvolution), Society of Exploration Geophysicists, 262–266 pp., 2001.
